# Supplementary material
Source: Springer Nature journal article supplement (https://www.springermedizin.de/resource/supplementary/12891_2009_730_MOESM3_ESM.pdf/9506280)
Supplement: MOESM3 [file 9506280]

The patient's evaluation of improvement on a 6-point Likert scale

Treatment satisfaction ( 5-point Likert scale - only registered at week 6)

Days off work

Type and number of co-interventions (use of pain-killers, NSAIDs, physiotherapy, corticosteroid injection)

Adverse reactions or complications of the treatment - increased pain, skin atrophy, gastro-intestinal reactions

Reasons for loss to follow-up

Elbow pain registered on VAS-scale (Visual Analogue Scale)

To what extent is the use of the elbow affected, registered on VAS-scale

Severity of main complaint, registered on VAS-scale

Whether the patient experiences pain on eight everyday activities (dressing, eating, washing, household tasks, opening doors, carrying objects, with work, at sports)

Pain-free grip strength registered with hand held dynamometer .

Maximum grip strength registered with hand held dynamometer.

Pressure-pain threshold over the epicondyle measured with algometer

Pain on resisted dorsiflexion of the wrist with extended elbow and fingers flexed or resisted dorsiflexion of third finger
